# Supplementary material
Source: PubMed Central journal article supplement (PMC7054091)
Supplement: AEM.02873-19-s0001.pdf [file AEM.02873-19-s0001.pdf]

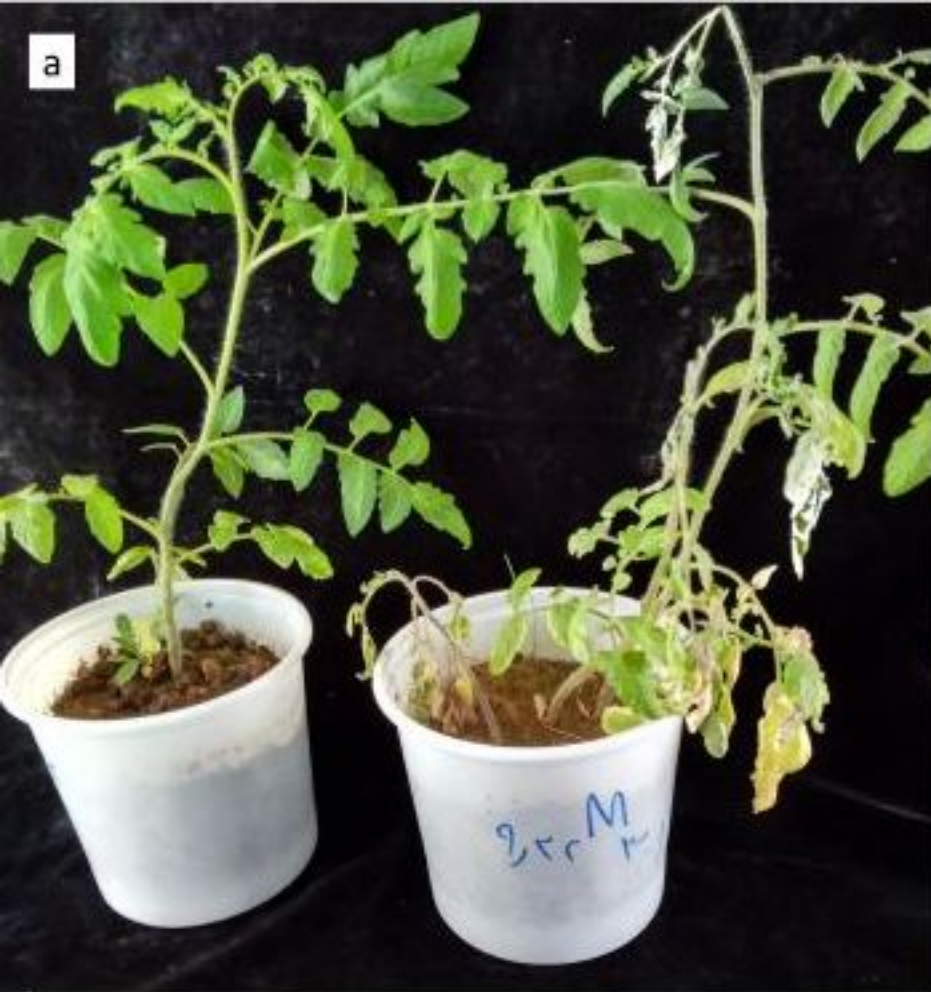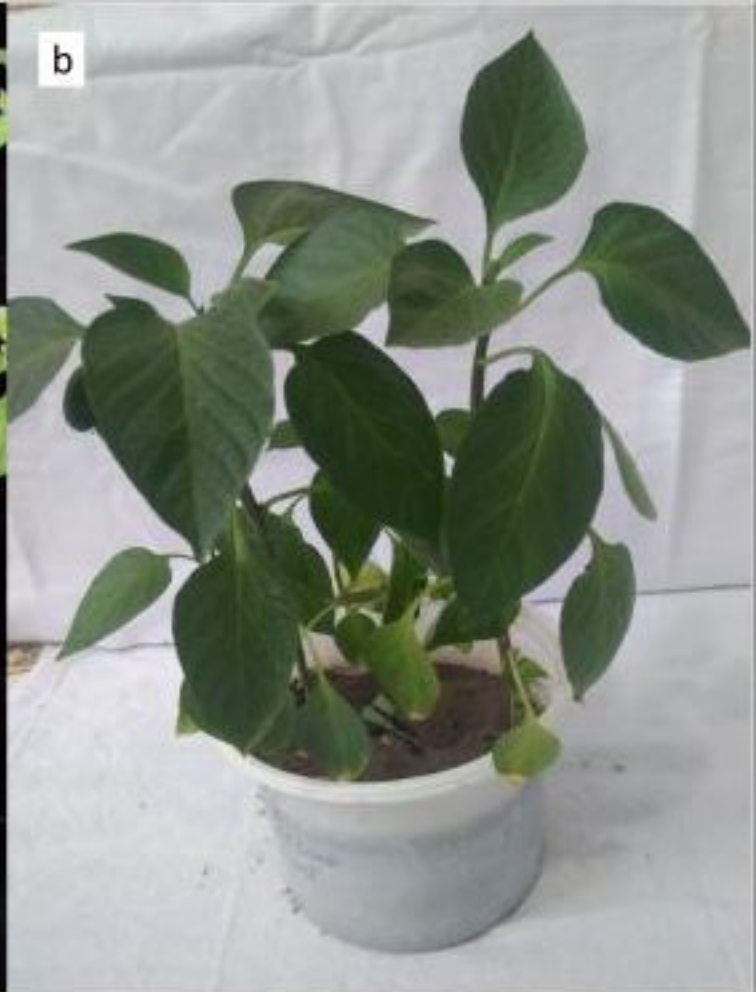

Figure S1: Tomato and pepper plants inoculated with *Clavibacter michiganensis sensu stricto* (ICMP 22049). Tomato plants inoculated with the strain ICMP 22049 showed wilting and plant death 10-12 days post inoculation (a, right side plant), while pepper plants inoculated using the same strain showed only stem canker symptoms on the site of inoculation with no wilting nor plant death in the same timeframe (b). Control tomato plant remained healthy (a, left side plant).
